# Supplementary material for: A new mechanism for spatial pattern formation via lateral and protrusion-mediated lateral signalling
Source: PubMed Central journal article supplement (PMC5134009; doi:10.1098/rsif.2016.0484), 2016-11

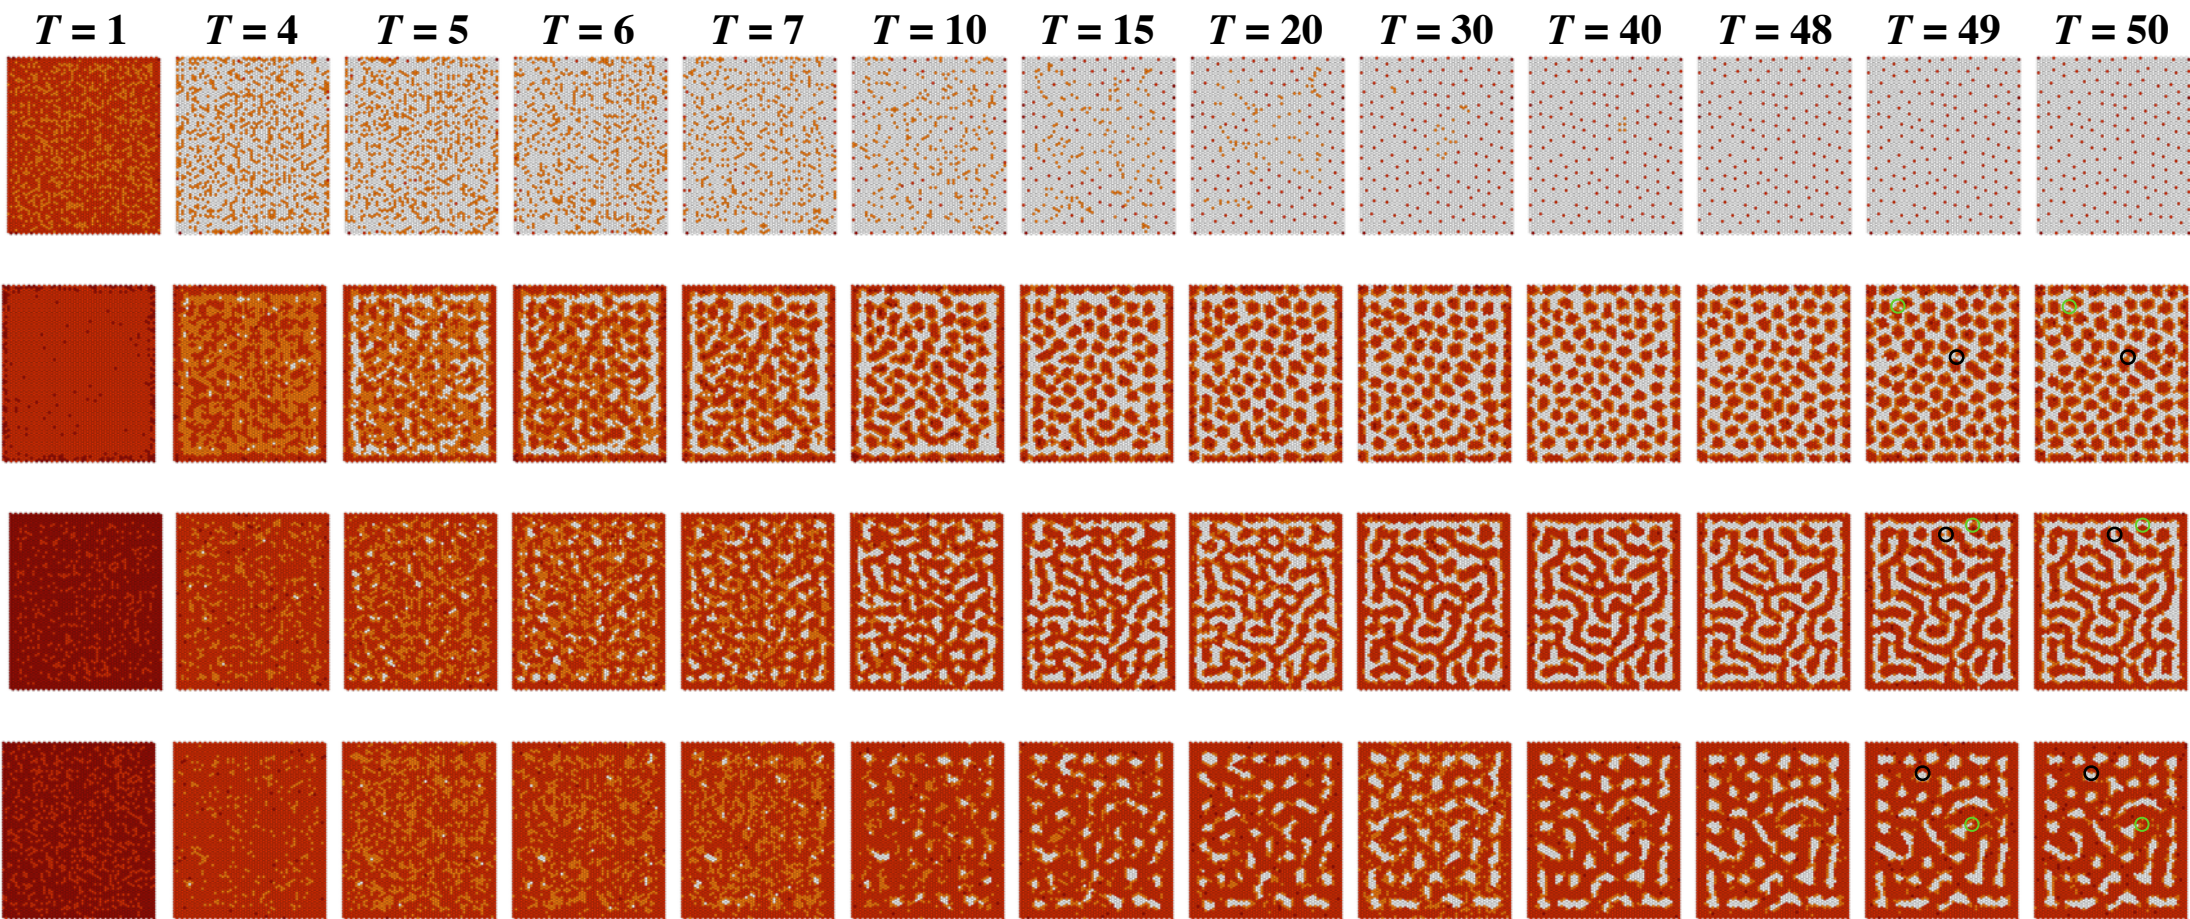

Supplement: rsif20160484supp1.pdf [file rsif20160484supp1.pdf]
